# Supplementary material for: Calcium-modified hierarchically porous aluminosilicate geopolymer as a highly efficient regenerable catalyst for biodiesel production
Source: Royal Society of Chemistry journal article supplement (doi:10.1039/c5ra01823d), 2015-01-01
Supplement: c5ra01823d1.pdf [file c5ra01823d1.pdf]

# Supporting Information

## Calcium-Modified Hierarchically Porous Aluminosilicate Geopolymer as a Highly Efficient Regenerable Catalyst for Biodiesel Production

Sudhanshu Sharma<sup>1</sup>, Dinesh Medpelli<sup>2</sup>, Shaojiang Chen<sup>2</sup> and Dong-Kyun Seo<sup>2\*</sup>

<sup>1</sup>Department of Chemistry, Indian Institute of Technology, Gandhinagar, VGEC campus, Chandkheda, Ahmedabad, Gujarat, India 382424.

<sup>2</sup>Department of Chemistry and Biochemistry, Arizona State University, Tempe, Arizona 85287-1604.

### Table of Content

**Figure S1.** Temperature-programmed desorption (TPD) profile of CO<sub>2</sub> desorbed from CaGEO-4.

**Figure S2.** 400 MHz <sup>1</sup>H NMR spectra of the product extracted by hexanes after the transesterification with CaGEO-4 (a), and a biodiesel standard for comparison (b).

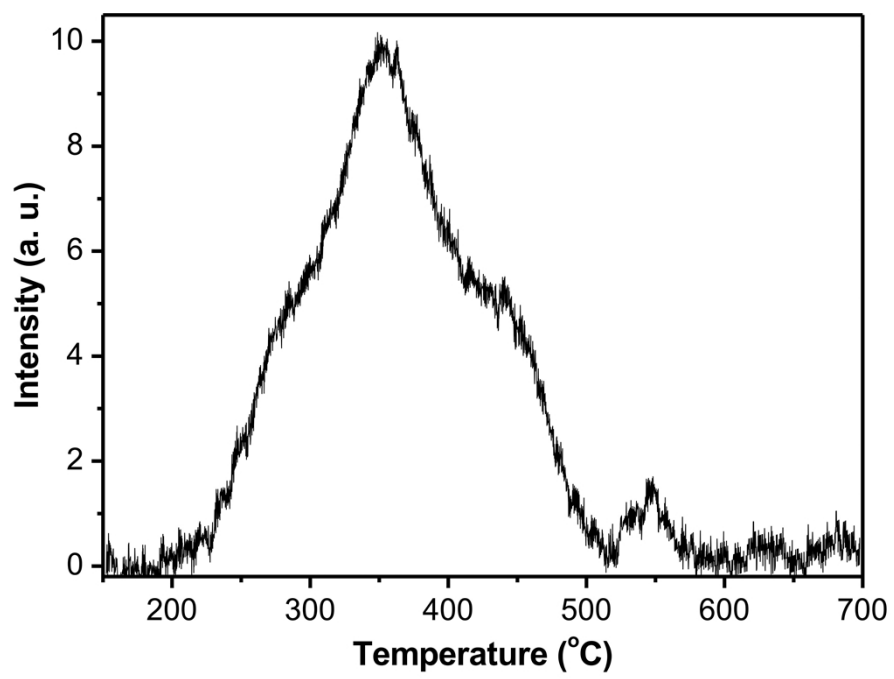

**Figure S1.** Temperature-programmed desorption (TPD) profile of CO<sub>2</sub> desorbed from CaGEO-4.

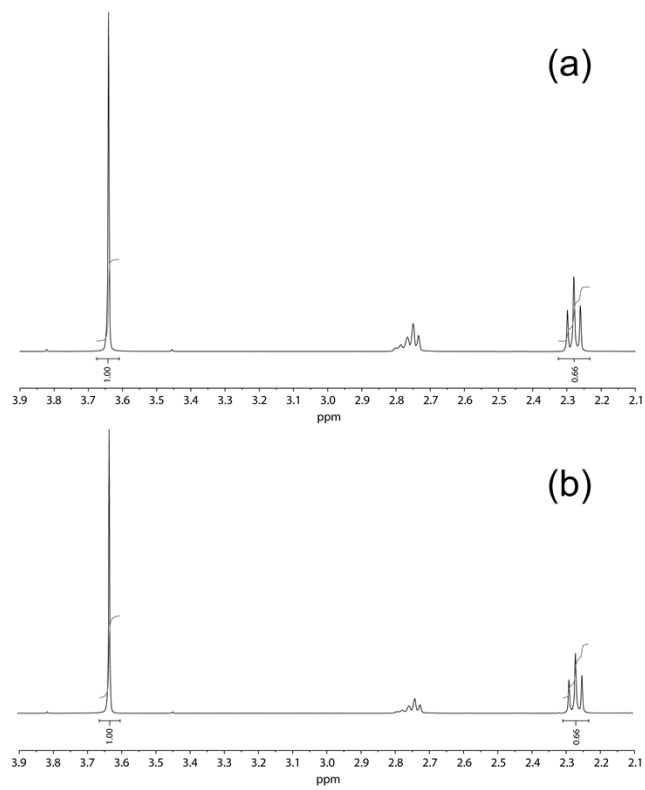

**Figure S2.** 400 MHz  $^1\text{H}$  NMR spectra of the product extracted by hexanes after the transesterification with CaGEO-4 (a), and a biodiesel standard for comparison (b).
